# Supplementary material for: Detection of circulating tumor DNA in plasma of patients with primary CNS lymphoma by digital droplet PCR
Source: Springer Nature journal article supplement (doi:10.1186/s12885-024-12191-z), 2024-04-02
Supplement: MOESM1 [file 26934512]

**Table S1. ddPCR results of positive control and negative control of MYD88 L265P**

| Sample                   | ddPCR for MYD88 L265P |                       |        |
|--------------------------|-----------------------|-----------------------|--------|
|                          | Mutant droplets       | Total filled droplets | VAF    |
| <b>Series dilution 1</b> |                       |                       |        |
| Expected VAF 10%         | 516                   | 3756                  | 0.1374 |
| Expected VAF 5%          | 292                   | 3777                  | 0.0773 |
| Expected VAF 1%          | 54                    | 3316                  | 0.0163 |
| Expected VAF 0.5%        | 37                    | 3707                  | 0.0100 |
| Expected VAF 0.3%        | 26                    | 3527                  | 0.0074 |
| Expected VAF 0.1%        | 5                     | 3596                  | 0.0014 |
| <b>Series dilution 2</b> |                       |                       |        |
| Expected VAF 10%         | 470                   | 3496                  | 0.1344 |
| Expected VAF 5%          | 262                   | 3858                  | 0.0679 |
| Expected VAF 1%          | 56                    | 3687                  | 0.0152 |
| Expected VAF 0.5%        | 29                    | 3180                  | 0.0091 |
| Expected VAF 0.3%        | 19                    | 3823                  | 0.0050 |
| Expected VAF 0.1%        | 6                     | 4065                  | 0.0015 |
| <b>Series dilution 3</b> |                       |                       |        |
| Expected VAF 10%         | 587                   | 3913                  | 0.1500 |
| Expected VAF 5%          | 243                   | 3586                  | 0.0678 |
| Expected VAF 1%          |                       |                       | FAIL   |
| Expected VAF 0.5%        | 34                    | 3897                  | 0.0087 |
| Expected VAF 0.3%        | 20                    | 3611                  | 0.0055 |
| Expected VAF 0.1%        | 9                     | 3345                  | 0.0027 |

**Table S2. ddPCR results of positive control and negative control of CD79B Y196**

| Sample                   | ddPCR for CD79B Y196 |                       |        |
|--------------------------|----------------------|-----------------------|--------|
|                          | Mutant droplets      | Total filled droplets | VAF    |
| <b>series dilution1</b>  |                      |                       |        |
| Expected VAF 10%         | 102                  | 1120                  | 0.0911 |
| Expected VAF 5%          | 116                  | 1888                  | 0.0614 |
| Expected VAF 1%          | 25                   | 2456                  | 0.0102 |
| Expected VAF 0.5%        | 23                   | 3048                  | 0.0075 |
| Expected VAF 0.3%        | 5                    | 2458                  | 0.0020 |
| Expected VAF 0.1%        | 6                    | 2918                  | 0.0021 |
| <b>Series dilution 2</b> |                      |                       |        |
| Expected VAF 10%         | 147                  | 1280                  | 0.1148 |
| Expected VAF 5%          | 117                  | 1892                  | 0.0618 |
| Expected VAF 1%          | 27                   | 2697                  | 0.0100 |
| Expected VAF 0.5%        | 23                   | 3126                  | 0.0074 |
| Expected VAF 0.3%        | 6                    | 2593                  | 0.0023 |
| Expected VAF 0.1%        | 4                    | 3187                  | 0.0013 |
| <b>Series dilution 3</b> |                      |                       |        |
| Expected VAF 10%         | 138                  | 1414                  | 0.0976 |
| Expected VAF 5%          | 99                   | 1861                  | 0.0532 |
| Expected VAF 1%          | 35                   | 2995                  | 0.0117 |
| Expected VAF 0.5%        | 13                   | 2426                  | 0.0054 |
| Expected VAF 0.3%        | 15                   | 3221                  | 0.0047 |
| Expected VAF 0.1%        | 4                    | 2644                  | 0.0015 |

Table S3. ddPCR results of healthy controls and patient samples

| Case            | Plasma sampling       | Histology  | Plasma collecting Tube | cfDNA yield/ml | ddPCR for MYD88 L265P |                 |                       |        | ddPCR for CD79B Y196 |              |                 |                       |        |               |
|-----------------|-----------------------|------------|------------------------|----------------|-----------------------|-----------------|-----------------------|--------|----------------------|--------------|-----------------|-----------------------|--------|---------------|
|                 |                       |            |                        |                | Tissue                | Plasma          |                       |        | Tissue               | Plasma       |                 |                       |        |               |
|                 |                       |            |                        |                |                       | Mutant droplets | Total filled droplets | VAF    |                      | Result cfDNA | Mutant droplets | Total filled droplets | VAF    | Result cfDNA  |
| #1              | Diagnosis             | PCNSL      | EDTA                   | 4.2            | negative              | 1               | 729                   | 0.0014 | negative             | negative     | 0               | 372                   | 0.0000 | inconclusive  |
| #2              | Diagnosis             | PCNSL      | STRECK                 | 14             | positive              | 1               | 685                   | 0.0015 | negative             | positive     | 1               | 779                   | 0.0013 | negative      |
| #3              | Diagnosis             | PCNSL      | STRECK                 | 15.5           | negative              | 0               | 1221                  | 0.0000 | negative             | negative     | 0               | 1095                  | 0.0000 | negative      |
| #4              | Diagnosis             | PCNSL      | STRECK                 | 12             | positive              | 2               | 2312                  | 0.0009 | negative             | negative     | 2               | 931                   | 0.0021 | negative      |
| #5              | Diagnosis             | PCNSL      | STRECK                 | 34.5           | positive              | 4               | 2423                  | 0.0017 | negative             | negative     | 1               | 1595                  | 0.0006 | negative      |
| #6              | Diagnosis             | PCNSL      | STRECK                 | 14.1           | positive              | 2               | 1329                  | 0.0015 | negative             | negative     | 2               | 902                   | 0.0022 | negative      |
| #7              | Diagnosis             | PCNSL      | STRECK                 | 14             | positive              | 1               | 1404                  | 0.0007 | negative             | positive     | 1               | 650                   | 0.0015 | negative      |
| #8              | Diagnosis             | PCNSL      | STRECK                 | 8.9            | positive              | 18              | 1774                  | 0.0101 | positive             | negative     | 0               | 654                   | 0.0000 | negative      |
| #9              | Diagnosis             | PCNSL      | EDTA                   | 26             |                       | 3               | 1254                  | 0.0024 | negative             |              | 1               | 1267                  | 0.0008 | negative      |
| #10             | Diagnosis             | PCNSL      | STRECK                 | 14.9           |                       | 0               | 1349                  | 0.0000 | negative             |              | 0               | 525                   | 0.0000 | negative      |
| #11             | Diagnosis             | PCNSL      | STRECK                 | 18.9           |                       | 0               | 2780                  | 0.0000 | negative             |              | 1               | 1284                  | 0.0008 | negative      |
| #12             | Diagnosis             | PCNSL      | STRECK                 | 10.8           |                       | 1               | 1494                  | 0.0007 | negative             |              | 0               | 740                   | 0.0000 | negative      |
| #13             | Diagnosis             | PCNSL      | STRECK                 | 10.8           |                       | 0               | 1266                  | 0.0000 | negative             |              | 0               | 628                   | 0.0000 | negative      |
| #14             | Diagnosis             | PTLD-PCNSL | EDTA                   | 19.9           |                       | 0               | 1232                  | 0.0000 | negative             |              | 0               | 963                   | 0.0000 | negative      |
| #15             | PD                    | PCNSL      | EDTA                   | 65             |                       | 7               | 1949                  | 0.0036 | positive             |              | 2               | 1266                  | 0.0016 | negative      |
| #16             | PD                    | PCNSL      | STRECK                 | 8              | negative              | 0               | 462                   | 0.0000 | inconclusive         |              | 0               | 620                   | 0.0000 | negative      |
| #17             | PR                    | PCNSL      | EDTA                   | 6.6            | positive              | 0               | 1134                  | 0.0000 | negative             | negative     | 0               | 258                   | 0.0000 | inconclusive  |
| #18             | PR                    | PCNSL      | EDTA                   | 7              | positive              | 7               | 1278                  | 0.0055 | positive             | negative     |                 |                       |        | not available |
| #19             | PR                    | PCNSL      | EDTA                   | 10.1           |                       | 0               | 1095                  | 0.0000 | negative             |              | 0               | 733                   | 0.0000 | negative      |
| #20             | PR                    | PCNSL      | STRECK                 | 10.9           |                       | 2               | 2085                  | 0.0010 | negative             |              | 1               | 886                   | 0.0011 | negative      |
| #21             | PR                    | PCNSL      | STRECK                 | 16             | positive              | 4               | 2470                  | 0.0016 | negative             | negative     | 0               | 384                   | 0.0000 | inconclusive  |
| #22             | PR                    | PCNSL      | STRECK                 | 8              | negative              | 0               | 878                   | 0.0000 | negative             | negative     | 0               | 406                   | 0.0000 | inconclusive  |
| #23             | PR                    | PTLD-PCNSL | STRECK                 | 44.5           |                       | 0               | 1831                  | 0.0000 | negative             |              | 0               | 1085                  | 0.0000 | negative      |
| #24             | PR                    | PTLD-PCNSL | STRECK                 | 16.1           | negative              | 0               | 1479                  | 0.0000 | negative             | negative     | 0               | 815                   | 0.0000 | negative      |
| <b>WBC</b>      |                       |            |                        |                |                       |                 |                       |        |                      |              |                 |                       |        |               |
| 1               | WBC                   |            |                        |                |                       | 0               | 3313                  | 0.0000 | negative             |              | 4               | 3073                  | 0.0013 | negative      |
| 2               | WBC                   |            |                        |                |                       | 0               | 1569                  | 0.0000 | negative             |              | 3               | 1587                  | 0.0019 | negative      |
| 3               | WBC                   |            |                        |                |                       | 0               | 917                   | 0.0000 | negative             |              | 0               | 836                   | 0.0000 | negative      |
| 4               | WBC                   |            |                        |                |                       | 1               | 4218                  | 0.0002 | negative             |              | 0               | 4058                  | 0.0000 | negative      |
| 5               | WBC                   |            |                        |                |                       | 0               | 1378                  | 0.0000 | negative             |              | 0               | 1276                  | 0.0000 | negative      |
| 6               | WBC                   |            |                        |                |                       | 0               | 710                   | 0.0000 | negative             |              | 1               | 816                   | 0.0012 | negative      |
| 7               | WBC                   |            |                        |                |                       | 2               | 5765                  | 0.0003 | negative             |              | 1               | 5318                  | 0.0002 | negative      |
| 8               | WBC                   |            |                        |                |                       | 1               | 1292                  | 0.0008 | negative             |              | 3               | 2493                  | 0.0012 | negative      |
| 9               | WBC                   |            |                        |                |                       | 1               | 2723                  | 0.0004 | negative             |              | 0               | 1024                  | 0.0000 | negative      |
| 10              | WBC                   |            |                        |                |                       | 2               | 4465                  | 0.0004 | negative             |              | 2               | 3717                  | 0.0005 | negative      |
| 11              | WBC                   |            |                        |                |                       | 2               | 1383                  | 0.0014 | negative             |              | 0               | 1292                  | 0.0000 | negative      |
| 12              | WBC                   |            |                        |                |                       | 0               | 661                   | 0.0000 | negative             |              | 2               | 584                   | 0.0034 | negative      |
| 13              | WBC                   |            |                        |                |                       | 0               | 2381                  | 0.0000 | negative             |              | 2               | 2085                  | 0.0010 | negative      |
| 14              | WBC                   |            |                        |                |                       | 1               | 500                   | 0.0020 | negative             |              | 0               | 511                   | 0.0000 | negative      |
| 15              | WBC                   |            |                        |                |                       | 0               | 324                   | 0.0000 | inconclusive         |              | 1               | 275                   | 0.0036 | inconclusive  |
| 16              | WBC                   |            |                        |                |                       | 1               | 4622                  | 0.0002 | negative             |              | 1               | 4422                  | 0.0002 | negative      |
| 17              | WBC                   |            |                        |                |                       | 0               | 1581                  | 0.0000 | negative             |              | 0               | 1427                  | 0.0000 | negative      |
| 18              | WBC                   |            |                        |                |                       | 1               | 847                   | 0.0012 | negative             |              | 0               | 797                   | 0.0000 | negative      |
| 19              | WBC                   |            |                        |                |                       | 1               | 2891                  | 0.0003 | negative             |              | 3               | 3211                  | 0.0009 | negative      |
| 20              | WBC                   |            |                        |                |                       | 1               | 1592                  | 0.0006 | negative             |              | 0               | 1578                  | 0.0000 | negative      |
| 21              | WBC                   |            |                        |                |                       | 0               | 768                   | 0.0000 | negative             |              | 1               | 871                   | 0.0011 | negative      |
| 22              | WBC                   |            |                        |                |                       | 1               | 3907                  | 0.0003 | negative             |              | 1               | 3179                  | 0.0003 | negative      |
| 23              | WBC                   |            |                        |                |                       | 1               | 2114                  | 0.0005 | negative             |              | 0               | 2021                  | 0.0000 | negative      |
| 24              | WBC                   |            |                        |                |                       | 1               | 987                   | 0.0010 | negative             |              | 0               | 960                   | 0.0000 | negative      |
| <b>Controls</b> |                       |            |                        |                |                       |                 |                       |        |                      |              |                 |                       |        |               |
| 1               | Positive control_1    |            |                        |                |                       | 3050            | 3051                  | 0.9997 | positive             |              | 348             | 1129                  | 0.3082 | positive      |
| 2               | Positive control_2    |            |                        |                |                       | 1682            | 1682                  | 1.0000 | positive             |              | 231             | 706                   | 0.3272 | positive      |
| 3               | Negative control_1    |            |                        |                |                       | 0               | 3566                  | 0.0000 | negative             |              | 3               | 3253                  | 0.0009 | negative      |
| 4               | Negative control_2    |            |                        |                |                       | 0               | 2087                  | 0.0000 | negative             |              | 1               | 1654                  | 0.0006 | negative      |
| 5               | No template control_1 |            |                        |                |                       | 0               | 0                     |        |                      |              | 0               | 0                     |        |               |
| 6               | No template control_2 |            |                        |                |                       | 0               | 0                     |        |                      |              | 0               | 0                     |        |               |

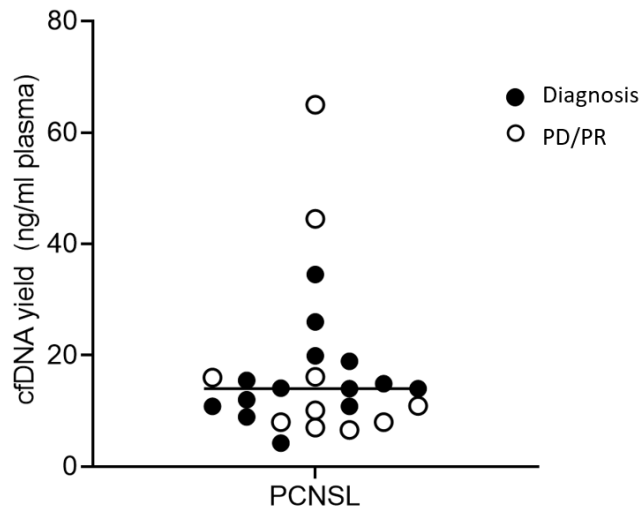

**Figure S1. cfDNA yields of plasma samples from PCNSL patients.** DNA yields ranged from 4.4 to 65 ng per ml of plasma. The median DNA yield in PCNSL cases was 14 ng/ml (range 4.4 to 65 ng/ml). Partial response (PR); Progressive disease (PD).

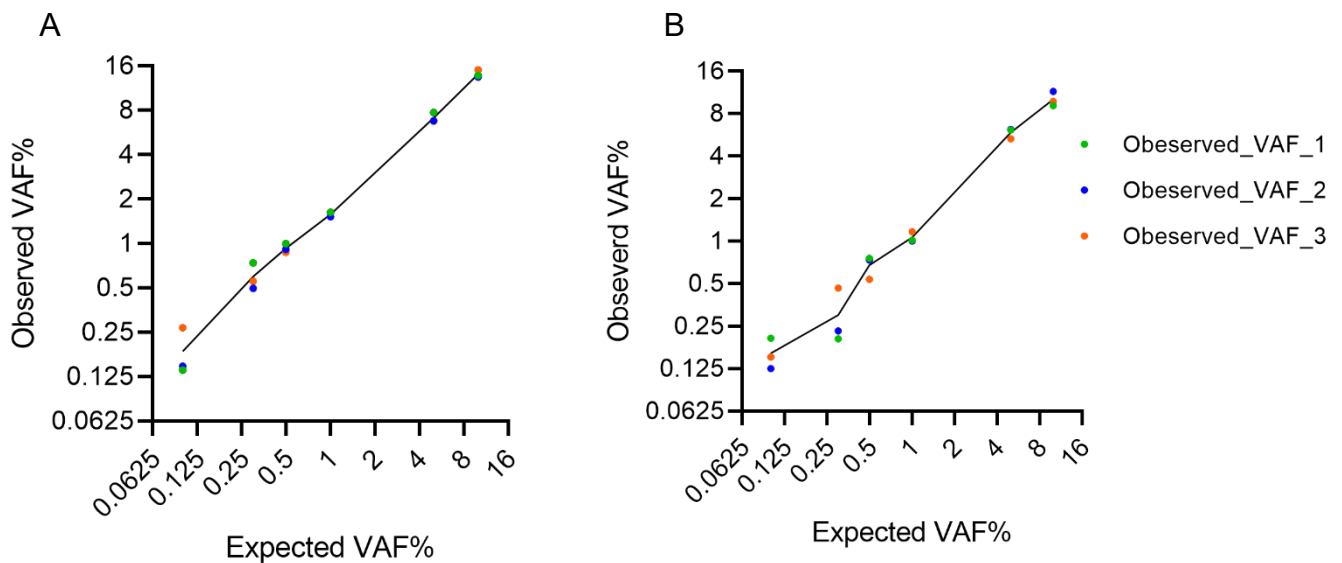

**Figure S2. Stimulate VAF of MYD88 L265P and CD79B Y196.** A. ddPCR test of MYD88 L265P on three independent series dilutions, expected VAFs is 10%, 5%, 1%, 0.5%, 0.3%, 0.1%. Observed results show a clear linear pattern ranging from 14% to 0.25%. B. ddPCR test of CD79B Y196 on three independent series dilutions, expected VAFs is 10%, 5%, 1%, 0.5%, 0.3%, 0.1%. Observed results show a clear linear pattern ranging from 10% to 0.5%. The black line shows the average VAF of the three independent experiments.
